# Supplementary material for: Accessible Deep Learning for Plant Biology: Predicting Gene Expression from Regulatory DNA with deepCRE
Source: Research Square preprint supplement (doi:10.21203/rs.3.rs-6196739/v1), 2025-04-09
Supplement: Supplementary file 1 [file 807846349b47e95c983d1365.xlsx]

## Sheet: Sheet1
		NATIVE						PROMOTER SWAPS							DELTA
								gUR	gTUR	gUR+gTUR	gUR	gTUR	gUR+gTUR		gUR	gTUR	gUR+gTUR	gUR	gTUR	gUR+gTUR		gUR	gTUR	gUR+gTUR	gUR	gTUR	gUR+gTUR
		Ath(leaf)	At(root)					Ath(leaf)+Os(ACT1prom)	Ath(leaf)+Os(5UTR)	Ath(leaf)+Os(ACT1prom+5UTR)	Ath(root)+Os(ACT1prom)	Ath(root)+Os(5UTR)	Ath(root)+Os(ACT1prom+5UTR)		Ath(leaf)+Os(ACT1prom)	Ath(leaf)+Os(5UTR)	Ath(leaf)+Os(ACT1prom+5UTR)	Ath(root)+Os(ACT1prom)	Ath(root)+Os(5UTR)	Ath(root)+Os(ACT1prom+5UTR)		Ath(leaf)+At(ACT1prom)	Ath(leaf)+Os(5UTR)	Ath(leaf)+At(ACT1prom+5UTR)	Ath(root)+At(ACT1prom)	Ath(root)+At(5UTR)	Ath(root)+At(ACT1prom+5UTR)
AT1G67090	RBCS1A	0.5487	0.4794			AT1G67090	RBCS1A	0.557	0.974	0.992	0.304	0.945	0.955		0.0083	0.4253	0.4433	-0.1754	0.4656	0.4756		-0.4297	-0.0127	0.0053	-0.6794	-0.0384	-0.0284
AT2G22200	ERF56	0.9203	0.4063			AT2G22200	ERF56	0.939	0.959	0.986	0.475	0.702	0.779		0.0187	0.0387	0.0657	0.0687	0.2957	0.3727		-0.0477	-0.0277	-0.0007	-0.5084	-0.2814	-0.2044
AT2G37620	ACT1	0.9867	0.9834			AT2G37620	ACT1	0.994	0.98	0.996	0.989	0.976	0.982		0.0073	-0.0067	0.0093	0.0056	-0.0074	-0.0014		0.0073	-0.0067	0.0093	0.0056	-0.0074	-0.0014
AT2G46800	MTP1	0.1898	0.4408			AT2G46800	MTP1	0.419	0.969	0.995	0.543	0.893	0.937		0.2292	0.7792	0.8052	0.1022	0.4522	0.4962		-0.5677	-0.0177	0.0083	-0.4404	-0.0904	-0.0464
AT3G02150	A-PTF-1	0.0846	0.0886			AT3G02150	A-PTF-1	0.066	0.299	0.94	0.065	0.567	0.694		-0.0186	0.2144	0.8554	-0.0236	0.4784	0.6054		-0.9207	-0.6877	-0.0467	-0.9184	-0.4164	-0.2894
AT4G30120	HMA3	0.0962	0.3978			AT4G30120	HMA3	0.051	0.46	0.981	0.338	0.329	0.71		-0.0452	0.3638	0.8848	-0.0598	-0.0688	0.3122		-0.9357	-0.5267	-0.0057	-0.6454	-0.6544	-0.2734
AT5G04050	NMAT3	0.924	0.8715			AT5G04050	NMAT3	0.941	0.952	0.99	0.9	0.902	0.943		0.017	0.028	0.066	0.0285	0.0305	0.0715		-0.0457	-0.0347	0.0033	-0.0834	-0.0814	-0.0404
AT5G52630	MEF1	0.3517	0.1813			AT5G52630	MEF1	0.316	0.702	0.981	0.222	0.532	0.834		-0.0357	0.3503	0.6293	0.0407	0.3507	0.6527		-0.6707	-0.2847	-0.0057	-0.7614	-0.4514	-0.1494
ATCG00270	PSBD	0.647	0.0421			ATCG00270	PSBD	0.618	0.975	0.968	0.064	0.301	0.769		-0.029	0.328	0.321	0.0219	0.2589	0.7269		-0.3687	-0.0117	-0.0187	-0.9194	-0.6824	-0.2144
					AVERAGE			0.5446	0.8078	0.981	0.4333	0.683	0.8448		0.0169	0.2801	0.4533	0.001	0.2506	0.4124		-0.4422	-0.179	-0.0057	-0.5501	-0.3004	-0.1387
		Sl(leaf)	Sl(root)					Sl(leaf)+Os(ACT1prom)	Sl(leaf)+Os(5UTR)	Sl(leaf)+Os(ACT1prom+5UTR)	Sl(root)+Os(ACT1prom)	Sl(root)+Os(5UTR)	Sl(root)+Os(ACT1prom+5UTR)		Sl(leaf)+Os(ACT1prom)	Sl(leaf)+Os(5UTR)	Sl(leaf)+Os(ACT1prom+5UTR)	Sl(root)+Os(ACT1prom)	Sl(root)+Os(5UTR)	Sl(root)+Os(ACT1prom+5UTR)		Sl(leaf)+Os(ACT1prom)	Sl(leaf)+At(5UTR)	Sl(leaf)+At(ACT1prom+5UTR)	Sl(root)+At(ACT1prom)	Sl(root)+At(5UTR)	Sl(root)+At(ACT1prom+5UTR)
AT1G67090	RBCS1A	0.922	0.8984			AT1G67090	RBCS1A	0.887	0.994	0.993	0.811	0.988	0.989		-0.035	0.072	0.071	-0.0874	0.0896	0.0906		0.1467	0.2537	0.2527	-0.0801	0.0969	0.0979
AT2G22200	ERF56	0.9622	0.9623			AT2G22200	ERF56	0.957	0.995	0.99	0.961	0.989	0.987		-0.0052	0.0328	0.0278	-0.0013	0.0267	0.0247		0.2167	0.2547	0.2497	0.0699	0.0979	0.0959
AT2G37620	ACT1	0.7403	0.8911			AT2G37620	ACT1	0.823	0.957	0.975	0.911	0.972	0.985		0.0827	0.2167	0.2347	0.0199	0.0809	0.0939		0.0827	0.2167	0.2347	0.0199	0.0809	0.0939
AT2G46800	MTP1	0.6356	0.4327			AT2G46800	MTP1	0.568	0.977	0.974	0.473	0.927	0.976		-0.0676	0.3414	0.3384	0.0403	0.4943	0.5433		-0.1723	0.2367	0.2337	-0.4181	0.0359	0.0849
AT3G02150	A-PTF-1	0.4864	0.3069			AT3G02150	A-PTF-1	0.402	0.993	0.989	0.225	0.986	0.981		-0.0844	0.5066	0.5026	-0.0819	0.6791	0.6741		-0.3383	0.2527	0.2487	-0.6661	0.0949	0.0899
AT4G30120	HMA3	0.9723	0.9852			AT4G30120	HMA3	0.9	0.995	0.997	0.873	0.994	0.996		-0.0723	0.0227	0.0247	-0.1122	0.0088	0.0108		0.1597	0.2547	0.2567	-0.0181	0.1029	0.1049
AT5G04050	NMAT3	0.8472	0.8977			AT5G04050	NMAT3	0.73	0.981	0.962	0.851	0.971	0.969		-0.1172	0.1338	0.1148	-0.0467	0.0733	0.0713		-0.0103	0.2407	0.2217	-0.0401	0.0799	0.0779
AT5G52630	MEF1	0.4496	0.2626			AT5G52630	MEF1	0.459	0.925	0.919	0.671	0.896	0.963		0.0094	0.4754	0.4694	0.4084	0.6334	0.7004		-0.2813	0.1847	0.1787	-0.2201	0.0049	0.0719
ATCG00270	PSBD	0.6451	0.7478			ATCG00270	PSBD	0.396	0.97	0.963	0.627	0.952	0.954		-0.2491	0.3249	0.3179	-0.1208	0.2042	0.2062		-0.3443	0.2297	0.2227	-0.2641	0.0609	0.0629
					AVERAGE			0.6802	0.9763	0.9736	0.7114	0.9639	0.9778		-0.0599	0.2363	0.2335	0.002	0.2545	0.2684		-0.06	0.2361	0.2333	-0.1797	0.0728	0.0866
		Sb(leaf)	Sb(root)					Sb(leaf)+Os(ACT1prom)	Sb(leaf)+Os(5UTR)	Sb(leaf)+Os(ACT1prom+5UTR)	Sb(root)+Os(ACT1prom)	Sb(root)+Os(5UTR)	Sb(root)+Os(ACT1prom+5UTR)		Sb(leaf)+Os(ACT1prom)	Sb(leaf)+Os(5UTR)	Sb(leaf)+Os(ACT1prom+5UTR)	Sb(root)+Os(ACT1prom)	Sb(root)+Os(5UTR)	Sb(root)+Os(ACT1prom+5UTR)		Sb(leaf)+At(ACT1prom)	Sb(leaf)+At(5UTR)	Sb(leaf)+At(ACT1prom+5UTR)	Sb(root)+At(ACT1prom)	Sb(root)+At(5UTR)	Sb(root)+At(ACT1prom+5UTR)
AT1G67090	RBCS1A	0.1443	0.3879			AT1G67090	RBCS1A	0.393	0.947	0.997	0.548	0.921	0.997		0.2487	0.8027	0.8527	0.1601	0.5331	0.6091		-0.459	0.095	0.145	0.016	0.389	0.465
AT2G22200	ERF56	0.3919	0.4974			AT2G22200	ERF56	0.699	0.941	0.997	0.689	0.845	0.996		0.3071	0.5491	0.6051	0.1916	0.3476	0.4986		-0.153	0.089	0.145	0.157	0.313	0.464
AT2G37620	ACT1	0.852	0.532			AT2G37620	ACT1	0.927	0.955	0.998	0.789	0.474	0.994		0.075	0.103	0.146	0.257	-0.058	0.462		0.075	0.103	0.146	0.257	-0.058	0.462
AT2G46800	MTP1	0.1019	0.0799			AT2G46800	MTP1	0.208	0.929	0.995	0.098	0.846	0.995		0.1061	0.8271	0.8931	0.0181	0.7661	0.9151		-0.644	0.077	0.143	-0.434	0.314	0.463
AT3G02150	A-PTF-1	0.4071	0.086			AT3G02150	A-PTF-1	0.357	0.935	0.996	0.048	0.425	0.994		-0.0501	0.5279	0.5889	-0.038	0.339	0.908		-0.495	0.083	0.144	-0.484	-0.107	0.462
AT4G30120	HMA3	0.3659	0.0624			AT4G30120	HMA3	0.481	0.953	0.995	0.078	0.784	0.983		0.1151	0.5871	0.6291	0.0156	0.7216	0.9206		-0.371	0.101	0.143	-0.454	0.252	0.451
AT5G04050	NMAT3	0.6079	0.419			AT5G04050	NMAT3	0.872	0.987	0.997	0.868	0.958	0.997		0.2641	0.3791	0.3891	0.449	0.539	0.578		0.02	0.135	0.145	0.336	0.426	0.465
AT5G52630	MEF1	0.1694	0.1377			AT5G52630	MEF1	0.46	0.977	0.997	0.148	0.895	0.995		0.2906	0.8076	0.8276	0.0103	0.7573	0.8573		-0.392	0.125	0.145	-0.384	0.363	0.463
ATCG00270	PSBD	0.3069	0.3118			ATCG00270	PSBD	0.74	0.94	0.996	0.746	0.922	0.997		0.4331	0.6331	0.6891	0.4342	0.6102	0.6852		-0.112	0.088	0.144	0.214	0.39	0.465
					AVERAGE			0.5708	0.9516	0.9964	0.4458	0.7856	0.9942		0.1989	0.5796	0.6245	0.1664	0.5062	0.7149		-0.2813	0.0995	0.1444	-0.0862	0.2536	0.4622
		Zm(leaf)	Zm(root)					Zm(leaf)+Os(ACT1prom)	Zm(leaf)+Os(5UTR)	Zm(leaf)+Os(ACT1prom+5UTR)	Zm(root)+Os(ACT1prom)	Zm(root)+Os(5UTR)	Zm(root)+Os(ACT1prom+5UTR)		Zm(leaf)+Os(ACT1prom)	Zm(leaf)+Os(5UTR)	Zm(leaf)+Os(ACT1prom+5UTR)	Zm(root)+Os(ACT1prom)	Zm(root)+Os(5UTR)	Zm(root)+Os(ACT1prom+5UTR)		Zm(leaf)+At(ACT1prom)	Zm(leaf)+At(5UTR)	Zm(leaf)+At(ACT1prom+5UTR)	Zm(root)+At(ACT1prom)	Zm(root)+At(5UTR)	Zm(root)+At(ACT1prom+5UTR)
AT1G67090	RBCS1A	0.4364	0.2881			AT1G67090	RBCS1A	0.208	0.896	0.996	0.26	0.896	0.988		-0.2284	0.4596	0.5596	-0.0281	0.6079	0.6999		-0.7372	-0.0492	0.0508	-0.683	-0.047	0.045
AT2G22200	ERF56	0.6433	0.5454			AT2G22200	ERF56	0.666	0.929	0.996	0.611	0.954	0.993		0.0227	0.2857	0.3527	0.0656	0.4086	0.4476		-0.2792	-0.0162	0.0508	-0.332	0.011	0.05
AT2G37620	ACT1	0.9452	0.943			AT2G37620	ACT1	0.943	0.859	0.995	0.941	0.897	0.995		-0.0022	-0.0862	0.0498	-0.002	-0.046	0.052		-0.0022	-0.0862	0.0498	-0.002	-0.046	0.052
AT2G46800	MTP1	0.3523	0.1448			AT2G46800	MTP1	0.208	0.939	0.996	0.158	0.931	0.988		-0.1443	0.5867	0.6437	0.0132	0.7862	0.8432		-0.7372	-0.0062	0.0508	-0.785	-0.012	0.045
AT3G02150	A-PTF-1	0.54	0.1549			AT3G02150	A-PTF-1	0.359	0.912	0.995	0.167	0.842	0.985		-0.181	0.372	0.455	0.0121	0.6871	0.8301		-0.5862	-0.0332	0.0498	-0.776	-0.101	0.042
AT4G30120	HMA3	0.7717	0.0377			AT4G30120	HMA3	0.389	0.961	0.998	0.069	0.816	0.995		-0.3827	0.1893	0.2263	0.0313	0.7783	0.9573		-0.5562	0.0158	0.0528	-0.874	-0.127	0.052
AT5G04050	NMAT3	0.8606	0.9322			AT5G04050	NMAT3	0.851	0.952	0.997	0.972	0.991	0.998		-0.0096	0.0914	0.1364	0.0398	0.0588	0.0658		-0.0942	0.0068	0.0518	0.029	0.048	0.055
AT5G52630	MEF1	0.272	0.1347			AT5G52630	MEF1	0.304	0.836	0.994	0.287	0.957	0.993		0.032	0.564	0.722	0.1523	0.8223	0.8583		-0.6412	-0.1092	0.0488	-0.656	0.014	0.05
ATCG00270	PSBD	0.2802	0.0447			ATCG00270	PSBD	0.469	0.915	0.995	0.3	0.867	0.992		0.1888	0.6348	0.7148	0.2553	0.8223	0.9473		-0.4762	-0.0302	0.0498	-0.643	-0.076	0.049
					AVERAGE			0.4886	0.911	0.9958	0.4183	0.9057	0.9919		-0.0783	0.3441	0.4289	0.0599	0.5473	0.6335		-0.4566	-0.0342	0.0506	-0.5246	-0.0373	0.0489
								Ath(leaf)+35S_pGZ14.1021	Ath(root)+35S_pGZ14.1021	DELTA					Ath(leaf)+35S_pGZ14.1021	Ath(root)+35S_pGZ14.1021
						AT1G67090	RBCS1A	0.743	0.534						0.1943	0.0546
						AT2G22200	ERF56	0.945	0.72						0.0247	0.3137
						AT2G37620	ACT1	0.994	0.992						0.0073	0.0086
						AT2G46800	MTP1	0.65	0.703						0.4602	0.2622
						AT3G02150	A-PTF-1	0.291	0.217						0.2064	0.1284
						AT4G30120	HMA3	0.351	0.577						0.2548	0.1792
						AT5G04050	NMAT3	0.978	0.949						0.054	0.0775
						AT5G52630	MEF1	0.639	0.511						0.2873	0.3297
						ATCG00270	PSBD	0.896	0.173						0.249	0.1309
					AVERAGE			0.7208	0.5973						0.1931	0.165
								Sl(leaf)+35S_pGZ14.1021	Sl(root)+35S_pGZ14.1021						Sl(leaf)+35S_pGZ14.1021	Sl(root)+35S_pGZ14.1021
						AT1G67090	RBCS1A	0.766	0.589						-0.156	-0.3094
						AT2G22200	ERF56	0.862	0.818						-0.1002	-0.1443
						AT2G37620	ACT1	0.592	0.669						-0.1483	-0.2221
						AT2G46800	MTP1	0.253	0.186						-0.3826	-0.2467
						AT3G02150	A-PTF-1	0.112	0.073						-0.3744	-0.2339
						AT4G30120	HMA3	0.651	0.445						-0.3213	-0.5402
						AT5G04050	NMAT3	0.178	0.234						-0.6692	-0.6637
						AT5G52630	MEF1	0.092	0.137						-0.3576	-0.1256
						ATCG00270	PSBD	0.076	0.146						-0.5691	-0.6018
					AVERAGE			0.398	0.3663						-0.3421	-0.3431
								Sb(leaf)+35S_pGZ14.1021	Sb(root)+35S_pGZ14.1021						Sb(leaf)+35S_pGZ14.1021	Sb(root)+35S_pGZ14.1021
						AT1G67090	RBCS1A	0.132	0.347						-0.0123	-0.0409
						AT2G22200	ERF56	0.165	0.302						-0.2269	-0.1954
						AT2G37620	ACT1	0.685	0.481						-0.167	-0.051
						AT2G46800	MTP1	0.087	0.097						-0.0149	0.0171
						AT3G02150	A-PTF-1	0.104	0.062						-0.3031	-0.024
						AT4G30120	HMA3	0.168	0.067						-0.1979	0.0046
						AT5G04050	NMAT3	0.534	0.233						-0.0739	-0.186
						AT5G52630	MEF1	0.23	0.169						0.0606	0.0313
						ATCG00270	PSBD	0.318	0.404						0.0111	0.0922
								0.2692	0.2402						-0.1027	-0.0391
															Zm(leaf)+35S_pGZ14.1021	Zm(root)+35S_pGZ14.1021
						AT1G67090	RBCS1A	0.254	0.175						-0.1824	-0.1131
						AT2G22200	ERF56	0.608	0.446						-0.0353	-0.0994
						AT2G37620	ACT1	0.961	0.906						0.0158	-0.037
						AT2G46800	MTP1	0.224	0.116						-0.1283	-0.0288
						AT3G02150	A-PTF-1	0.211	0.101						-0.329	-0.0539
						AT4G30120	HMA3	0.589	0.053						-0.1827	0.0153
						AT5G04050	NMAT3	0.678	0.906						-0.1826	-0.0262
						AT5G52630	MEF1	0.324	0.127						0.052	-0.0077
						ATCG00270	PSBD	0.217	0.062						-0.0632	0.0173
					AVERAGE			0.4518	0.3213						-0.1151	-0.0371
								Ath(leaf)+ppgUR	Ath(root)+ppgUR						At(leaf)+ppgUR	At(root)+ppgUR
						AT1G67090	RBCS1A	0.612	0.745						0.0633	0.2656
						AT2G22200	ERF56	0.558	0.265						-0.3623	-0.1413
						AT2G37620	ACT1	0.845	0.909						-0.1417	-0.0744
						AT2G46800	MTP1	0.642	0.553						0.4522	0.1122
						AT3G02150	A-PTF-1	0.004	0.149						-0.0806	0.0604
						AT4G30120	HMA3	0.008	0.116						-0.0882	-0.2818
						AT5G04050	NMAT3	0.143	0.418						-0.781	-0.4535
						AT5G52630	MEF1	0.073	0.095						-0.2787	-0.0863
						ATCG00270	PSBD	0.139	0.067						-0.508	0.0249
					AVERAGE			0.336	0.3686						-0.1917	-0.0638
								Sl(leaf)+ppgUR	Sl(root)+ppgUR						Sl(leaf)+ppgUR	Sl(root)+ppgUR
						AT1G67090	RBCS1A	0.948	0.853						0.026	-0.0454
						AT2G22200	ERF56	0.909	0.81						-0.0532	-0.1523
						AT2G37620	ACT1	0.617	0.732						-0.1233	-0.1591
						AT2G46800	MTP1	0.514	0.387						-0.1216	-0.0457
						AT3G02150	A-PTF-1	0.857	0.382						0.3706	0.0751
						AT4G30120	HMA3	0.935	0.937						-0.0373	-0.0482
						AT5G04050	NMAT3	0.674	0.377						-0.1732	-0.5207
						AT5G52630	MEF1	0.276	0.115						-0.1736	-0.1476
						ATCG00270	PSBD	0.509	0.323						-0.1361	-0.4248
					AVERAGE			0.6932	0.5462						-0.0469	-0.1632
								Sb(leaf)+ppgUR	Sb(root)+ppgUR						Sb(leaf)+ppgUR	Sb(root)+ppgUR
						AT1G67090	RBCS1A	0.318	0.388						0.1737	0.0001
						AT2G22200	ERF56	0.439	0.432						0.0471	-0.0654
						AT2G37620	ACT1	0.914	0.184						0.062	-0.348
						AT2G46800	MTP1	0.153	0.131						0.0511	0.0511
						AT3G02150	A-PTF-1	0.353	0.085						-0.0541	-0.001
						AT4G30120	HMA3	0.873	0.231						0.5071	0.1686
						AT5G04050	NMAT3	0.627	0.236						0.0191	-0.183
						AT5G52630	MEF1	0.495	0.199						0.3256	0.0613
						ATCG00270	PSBD	0.371	0.294						0.0641	-0.0178
					AVERAGE			0.5048	0.2422						0.1329	-0.0371
								Zm(leaf)+ppgUR	Zm(root)+ppgUR						Zm(leaf)+ppgUR	Zm(root)+ppgUR
						AT1G67090	RBCS1A	0.446	0.421						0.0096	0.1329
						AT2G22200	ERF56	0.624	0.795						-0.0193	0.2496
						AT2G37620	ACT1	0.672	0.679						-0.2732	-0.264
						AT2G46800	MTP1	0.529	0.249						0.1767	0.1042
						AT3G02150	A-PTF-1	0.659	0.309						0.119	0.1541
						AT4G30120	HMA3	0.809	0.475						0.0373	0.4373
						AT5G04050	NMAT3	0.666	0.946						-0.1946	0.0138
						AT5G52630	MEF1	0.568	0.852						0.296	0.7173
						ATCG00270	PSBD	0.252	0.594						-0.0282	0.5493
					AVERAGE			0.5806	0.5911						0.0137	0.2327
								zm(leaf)OsACT1.1185-1230	zm(leaf)OsACT1.1185-1230
								native	degen
						AT1G67090	RBCS1A	0.16	-0.02
						AT2G22200	ERF56	0.12	0.04
						AT2G37620	ACT1	0	-0.01
						AT2G46800	MTP1	0.23	0.02
						AT3G02150	A-PTF-1	0.06	0
						AT4G30120	HMA3	0.13	0.04
						AT5G04050	NMAT3	0.08	0.02
						AT5G52630	MEF1	0.02	0.01
						ATCG00270	PSBD	0.18	-0.0001
