# Supplementary material for: Accessible Deep Learning for Plant Biology: Predicting Gene Expression from Regulatory DNA with deepCRE
Source: Research Square preprint supplement (doi:10.21203/rs.3.rs-6196739/v1), 2025-04-09
Supplement: Supplementary file 2 [file 8fe736359e84a8583fae94ce.xlsx]

## Sheet: Tabellenblatt1
Probability of high expression	AT1G67090	AT2G22200	AT2G37620	AT2G46800	AT3G02150	AT4G30120	AT5G04050	AT5G52630	ATCG00270
	RBCS1A	ERF56	ACT1	MTP1	A-PTF-1	HMA3	NMAT3	MEF1	psbD
At(leaf)	0.548 *	0.92 *	0.986 *	0.189	0.084	0.0962 *	0.924	0.351 *	0.647 *
At(root)	0.479	0.406 *	0.983 *	0.440	0.088 *	0.397 *	0.871	0.181 *	0.042 *
Sl(leaf)	0.922	0.962	0.740	0.635	0.486	0.972	0.847	0.449	0.645
Sl(root)	0.898	0.962	0.891	0.432	0.306	0.985	0.897	0.262	0.747
Sb(leaf)	0.144	0.391	0.852	0.101	0.407	0.365	0.607	0.169	0.306
Sb(root)	0.387	0.497	0.532	0.079	0.086	0.062	0.419	0.1377	0.311
Zm(leaf)	0.436	0.643	0.945	0.352	0.54	0.771	0.860	0.272	0.280
Zm(root)	0.288	0.545	0.943	0.144	0.154	0.037	0.932	0.134	0.044
total TDR	3/9	Na	9/9	1/9	Na	5/9	1/9	9/9	Na
AtTDR	1/2	2/2	2/2	0/2	1/2	2/2	0/2	2/2	2/2
