# Supplementary material for: Accessible Deep Learning for Plant Biology: Predicting Gene Expression from Regulatory DNA with deepCRE
Source: Research Square preprint supplement (doi:10.21203/rs.3.rs-6196739/v1), 2025-04-09
Supplement: Supplementary file 3 [file 977b702d5a1ef31e21e04177.xlsx]

## Sheet: Sheet1
Genome (fasta and gtf)	Description	Available deepCRE models	Description	Citation
Arabidopsis thaliana (TAIR10)	Downloaded from Ensembl Plants on 2024-10-29.	dCRE-At(leaf)-S0	Trained on bulk RNAseq from leaf tissue, single species reference training	(#1) Peleke, F.F., Zumkeller, S.M., Gültas, M. et al. Deep learning the cis-regulatory code for gene expression in selected model plants. Nat Commun 15, 3488 (2024). https://doi.org/10.1038/s41467-024-47744-0
		dCRE-At(root)-S0	Trained on bulk RNAseq from root tissue, single species reference training	(#1)
Beta vulgaris (RefBeet-1.2.2)	Downloaded from Ensembl Plants on 2024-10-29.
Brassica oleracea (BOL)	Downloaded from Ensembl Plants on 2024-10-29.
Camelina sativa (Cs)	Downloaded from Ensembl Plants on 2024-10-29.
Cucumis sativus (ASM407v2)	Downloaded from Ensembl Plants on 2024-10-29.
Daucus carota (ASM162521v1)	Downloaded from Ensembl Plants on 2024-10-29.
Oryza sativa Japonica (IRGSP-1.0)	Downloaded from Ensembl Plants on 2024-10-29.
Solanum lycopersicum (ITAG3.0)	Downloaded from Ensembl Plants on 2024-10-29.	dCRE-Sl(leaf)-S0	Trained on bulk RNAseq from leaf tissue, single species reference training	(#1)
		dCRE-Sl(root)-S0	Trained on bulk RNAseq from root tissue, single species reference training	(#1)
Solanum tuberosum (SolTub_3.0)	Downloaded from Ensembl Plants on 2024-10-29.
Sorghum bicolor (XXX)	XXX	dCRE-Sb(leaf)-S0	Trained on bulk RNAseq from leaf tissue, single species reference training	(#1)
		dCRE-Sb(root)-S0	Trained on bulk RNAseq from root tissue, single species reference training	(#1)
Zea mays (B73-REFERENCE-NAM-5.0)	Downloaded from Ensembl Plants on 2024-10-29.	dCRE-Zm(leaf)-S0	Trained on bulk RNAseq from leaf tissue, single species reference training	(#1)
		dCRE-Zm(root)-S0	Trained on bulk RNAseq from root tissue, single species reference training	(#1)
