# Supplementary material for: Accessible Deep Learning for Plant Biology: Predicting Gene Expression from Regulatory DNA with deepCRE
Source: Research Square preprint supplement (doi:10.21203/rs.3.rs-6196739/v1), 2025-04-09
Supplement: Supplementary file 4 [file b6d984813ea787668650133f.xlsx]

## Sheet: Sheet1
NO#	#CHROM	POS	ID	REF	ALT	Region	HAPLOTYPE	CONTRIBUTOR	ALTCtrMUT-1	ALTCtrMUT-2	ALTCtrMUT-3	ALTCtrMUT-4	ALTCtrMUT-5
0	1	20135013	.	C	A	Promoter(gUR)	I-Cat-0	yes	T	G	T	G	G
1	1	20135022	.	C	A	Promoter(gUR)	I-Cat-1	no
2	1	20135057	.	A	T	Promoter(gUR)	I-Cat-2	yes	C	C	G	G	C
3	1	20135060	.	C	T	Promoter(gUR)	I-Cat-3	no
4	1	20135062	.	A	G	Promoter(gUR)	I-Cat-4	no
5	1	20135073	.	C	T	Promoter(gUR)	I-Cat-5	yes	A	G	G	A	A
6	1	20135077	.	T	G	Promoter(gUR)	I-Cat-6	yes	C	A	C	A	A
7	1	20135082	.	T	C	Promoter(gUR)	I-Cat-7	yes	G	A	G	A	A
8	1	20135096	.	A	G	Promoter(gUR)	I-Cat-8	yes	C	T	T	C	C
9	1	20135143	.	A	C	Promoter(gUR)	I-Cat-9	yes	G	G	T	T	T
10	1	20135157	.	T	G	Promoter(gUR)	I-Cat-10	no
11	1	20135162	.	C	A	Promoter(gUR)	I-Cat-11	yes	T	G	T	G	G
12	1	20135181	.	G	A	Promoter(gUR)	I-Cat-12	no
13	1	20135211	.	T	C	Promoter(gUR)	I-Cat-13	no
14	1	20135212	.	C	T	Promoter(gUR)	I-Cat-14	yes	A	A	G	G	A
15	1	20135233	.	A	G	Promoter(gUR)	I-Cat-15	no
16	1	20135236	.	G	A	Promoter(gUR)	I-Cat-16	no
							Delta to Max	-0.14	-0.01	-0.01	-0.05	-0.05	-0.04
0	1	20135013	.	C	A	Promoter(gUR)	Tibet	yes
17	1	20135016	.	G	T	Promoter(gUR)	Tibet	no
18	1	20135052	.	A	G	Promoter(gUR)	Tibet	no
19	1	20135098	.	A	T	Promoter(gUR)	Tibet	no
11	1	20135162	.	C	A	Promoter(gUR)	Tibet	yes
13	1	20135211	.	T	C	Promoter(gUR)	Tibet	no
14	1	20135212	.	C	T	Promoter(gUR)	Tibet	yes
15	1	20135233	.	A	G	Promoter(gUR)	Tibet	no
16	1	20135236	.	G	A	Promoter(gUR)	Tibet	no
							Delta to Max	0.03
